# Supplementary material
Source: Springer Nature journal article supplement (https://www.springerprofessional.de/resource/supplementary/13174_2012_1_MOESM5_ESM.pdf/10784722)

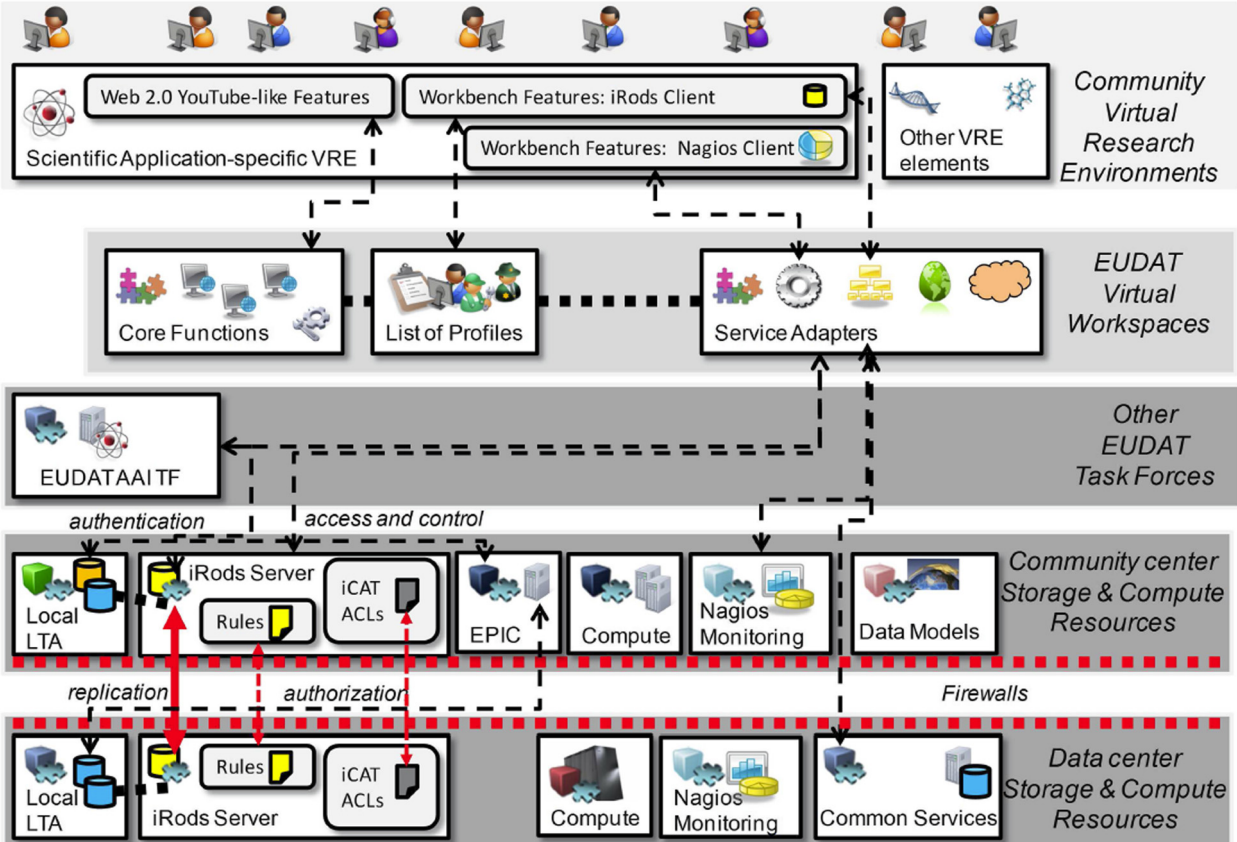

Supplement: MOESM5 [file 10784722]
